# Supplementary material for: Lagrangian Dual Decision Rules for Multistage Stochastic Mixed-Integer Programming
Source: Atypon-hosted journal article supplement (doi:10.1287/opre.2022.2366), 2022-10-12
Supplement: opre.2022.2366.sm1.pdf [file opre.2022.2366.sm1.pdf]

# Online Supplement for “Lagrangian Dual Decision Rules for Multistage Stochastic Mixed-Integer Programming”

Maryam Daryalal

Department of Decision Sciences, HEC Montréal, Montréal, Québec H3T 2A7, Canada, maryam.daryalal@hec.ca

Merve Bodur

Department of Mechanical and Industrial Engineering, University of Toronto, Toronto, Ontario M5S 3G8, Canada, bodur@mie.utoronto.ca

James R. Luedtke

Department of Industrial and Systems Engineering, University of Wisconsin, Madison, Wisconsin 53706, jim.luedtke@wisc.edu

---

This supplement paper provides all appendices referenced in the body of the paper, including proofs and further details on the results.

---

## Appendix A: Proof of Lemma 1

Expanding the objective function in (5a) and rearranging the terms yields

$$\sum_{t \in [T]} \left( \mathbb{E}_{\xi^T} [c_t(\xi^t)^\top y_t(\xi^T)] + \mathbb{E}_{\xi^T} [\gamma_t(\xi^T)^\top y_t(\xi^T)] - \mathbb{E}_{\xi^T} [\gamma_t(\xi^T)^\top \mathbb{E}_{\xi'^T} [y_t(\xi'^T) | \xi'^t = \xi^t]] \right). \quad (1)$$

For the last term in (1), the following equalities hold

$$\mathbb{E}_{\xi^T} [\gamma_t(\xi^T)^\top \mathbb{E}_{\xi'^T} [y_t(\xi'^T) | \xi'^t = \xi^t]] = \mathbb{E}_{\xi^T} [\mathbb{E}_{\xi'^T} [\gamma_t(\xi^T)^\top y_t(\xi'^T) | \xi'^t = \xi^t]] \quad (2a)$$

$$= \mathbb{E}_{\xi'^T} [\mathbb{E}_{\xi^T} [\gamma_t(\xi^T)^\top y_t(\xi'^T) | \xi'^t = \xi^t]] \quad (2b)$$

$$= \mathbb{E}_{\xi'^T} [\mathbb{E}_{\xi^T} [\gamma_t(\xi^T) | \xi'^t = \xi^t] y_t(\xi'^T)] \quad (2c)$$

$$= \mathbb{E}_{\xi^T} [\mathbb{E}_{\xi'^T} [\gamma_t(\xi'^T) | \xi'^t = \xi^t] y_t(\xi^T)]. \quad (2d)$$

First note that, in  $\mathbb{E}_{\xi^T} [\gamma_t(\xi^T)^\top \mathbb{E}_{\xi'^T} [y_t(\xi'^T) | \xi'^t = \xi^t]]$ , since the dual function  $\gamma_t(\xi^T)$  is fixed,  $\gamma_t(\xi^T)$  is a vector of numbers inside the first expectation, hence it can be pushed inside the second expectation (Equation (2a)). As we have assumed that  $\gamma_t(\xi^T)$  is a member of the set  $\Gamma_t$  with its expectation being bounded, and  $\mathbb{E}[\text{dia}(Y_t(\xi'^t))]$ , the expectation of the diameter of the set  $Y_t(\xi'^t)$

to which  $y_t(\xi^t)$  belongs, is finite, using Fubini-Tonelli Theorem (Knapp 2005) the order of the two expectations can be exchanged (Equation (2b)). Then we can take  $y_t(\xi^t)$  out from the inside expectation, as it is just a vector of numbers inside (Equation (2c)). Since  $\xi^T$  and  $\xi'^T$  have the same support and distribution, the last equality (Equation (2d)) is satisfied. Equality (6) can then be proven by substitution.

## Appendix B: Proof of Lemma 2

First observe that since the objective in (12) is linear, the restricted Lagrangian dual problem (14) can be written as

$$\begin{aligned} z^{\text{RLD}} &= \max_{\lambda, \alpha} \min_x \{c^\top x + \lambda^\top (d - Dx) : x \in \text{conv}(X)\} \\ \text{s.t. } &\lambda - G\alpha = 0 \end{aligned}$$

Let  $\{x^i\}_{i \in [M]}$  and  $\{r^k\}_{k \in [K]}$  be the complete set of extreme points and extreme rays of  $\text{conv}(X)$ , respectively. Then, for any fixed  $\lambda$ , we have

$$z(\lambda) = \begin{cases} -\infty, & \exists r^k : (c^\top - \lambda^\top D)r^k < 0 \\ \min_{i \in [M]} \{c^\top x^i + \lambda^\top (d - Dx^i)\}, & \text{otherwise.} \end{cases}$$

Therefore we can reformulate the Lagrangian dual problem as

$$\begin{aligned} z^{\text{LD}} &= \max_{\lambda, \alpha} \min_{i \in [M]} \{c^\top x^i + \lambda^\top (d - Dx^i)\} \\ \text{s.t. } &\lambda - G\alpha = 0 \\ &(c^\top - \lambda^\top D)r^k \geq 0, \quad k \in [K] \end{aligned}$$

which is equivalent to

$$z^{\text{LD}} = \max_{\lambda, \alpha, \eta} \eta \tag{3a}$$

$$\text{s.t. } \lambda - G\alpha = 0 \tag{\theta} \tag{3b}$$

$$\lambda^\top D r^k \leq c^\top r^k \quad k \in [K] \tag{\beta_k} \tag{3c}$$

$$\eta + \lambda^\top (Dx^i - d) \leq c^\top x^i \quad i \in [M] \tag{\gamma_i} \tag{3d}$$

where  $\theta$ ,  $\beta_k$  and  $\gamma_i$  are the dual variables associated with constraints (3b), (3c) and (3d) respectively.

Now take the dual of the above problem

$$\begin{aligned} \min_{\theta, \beta, \gamma} & c^\top \left( \sum_{i \in [M]} \gamma_i x^i + \sum_{k \in [K]} \beta_k r^k \right) \\ \text{s.t. } & \sum_{i \in [M]} \gamma_i = 1 \end{aligned}$$

$$\begin{aligned}
& D \left( \sum_{i \in [M]} \gamma_i x^i + \sum_{k \in [K]} \beta_k r^k \right) + \theta = d \\
& -G^\top \theta = 0 \\
& \gamma, \beta \geq 0
\end{aligned}$$

As we know that  $\text{conv}(X) = \left\{ \sum_{i \in [M]} \gamma_i x^i + \sum_{k \in [K]} \beta_k r^k : \sum_{i \in [M]} \gamma_i = 1, \gamma_i, \beta_k \geq 0, i \in [M], k \in [K] \right\}$ , we have

$$\begin{aligned}
& \min_{x, \theta} c^\top x \\
& \text{s.t. } x \in \text{conv}(X) \\
& Dx + \theta = d \\
& -G^\top \theta = 0.
\end{aligned} \tag{4}$$

Eliminating the  $\theta$  variables using (4) yields the result.

Note that if  $\theta = \mathbf{0}$ , then the original MIP solution, say  $x^*$ , is feasible. So, this gives a relaxation of the original MIP.

## Appendix C: The Lot-sizing Problem

### C.1. Stagewise Lagrangian Dual

Relax state equations (27b), except for  $t = 1$ . Then, we have

$$\min \mathbb{E}[L(\lambda)] \tag{5a}$$

$$\text{s.t. } i_{1j}^-(\xi^1) - i_{1j}^+(\xi^1) = d_{1j}(\xi^1), \quad j \in [J], \mathbb{P}\text{-a.e. } \xi^T \in \Xi \tag{5b}$$

$$(27c) - (27i) \tag{5c}$$

where

$$\begin{aligned}
L(\lambda) := & \sum_{t \in [T]} \left( \sum_{j \in [J]} \left( C_{tj}^{i^+}(\xi^t) i_{tj}^+(\xi^t) + C_{tj}^{i^-}(\xi^t) i_{tj}^-(\xi^t) + C_{tj}^y(\xi^t) y_{tj}(\xi^t) \right) + C_t^o(\xi^t) o_t(\xi^t) \right) \\
& + \sum_{t \in [T]} \sum_{j \in [J]} \lambda_{tj}(\xi^t) \left( i_{tj}^-(\xi^t) - i_{tj}^+(\xi^t) + i_{t-1,j}^+(\xi^{t-1}) - i_{t-1,j}^-(\xi^{t-1}) + x_{t-1,j}(\xi^{t-1}) - D_{tj}(\xi^t) \right).
\end{aligned}$$

Restrict  $\lambda_t(\xi^t)$  to follow LDDR

$$\lambda_{tj}(\xi^t) = \sum_{k \in [K_t]} \Phi_{tjk}(\xi^t) \alpha_{tjk}.$$

Then, for fixed  $\hat{\alpha}$ , the objective function (5a) is equivalent to

$$\sum_{t \in [T]} \mathbb{E}[L_t(\hat{\alpha})] \tag{6}$$

where

$$\begin{aligned}
L_t(\hat{\alpha}, \boldsymbol{\xi}^t) := & \sum_{j \in [J]} \left[ \left( \sum_{k \in [K_t]} \Phi_{tjk}(\boldsymbol{\xi}^t) \alpha_{tjk} \right) (-D_{tj}(\boldsymbol{\xi}^t)) \right. \\
& + \left( \mathbb{E} \left[ \sum_{k \in [K_{t+1}]} \Phi_{t+1,j,k}(\boldsymbol{\xi}^{t+1}) \alpha_{t+1,jk} \mid \boldsymbol{\xi}^t \right] \right) x_{tj} \\
& + \left( C_{tj}^{i^+}(\boldsymbol{\xi}^t) - \sum_{k \in [K_t]} \Phi_{tjk}(\boldsymbol{\xi}^t) \alpha_{tjk} + \mathbb{E} \left[ \sum_{k \in [K_{t+1}]} \Phi_{t+1,j,k}(\boldsymbol{\xi}^{t+1}) \alpha_{t+1,jk} \mid \boldsymbol{\xi}^t \right] \right) i_{tj}^+ \\
& + \left( C_{tj}^{i^-}(\boldsymbol{\xi}^t) + \sum_{k \in [K_t]} \Phi_{tjk}(\boldsymbol{\xi}^t) \alpha_{tjk} - \mathbb{E} \left[ \sum_{k \in [K_{t+1}]} \Phi_{t+1,j,k}(\boldsymbol{\xi}^{t+1}) \alpha_{t+1,jk} \mid \boldsymbol{\xi}^t \right] \right) i_{tj}^- \\
& \left. + C_{tj}^y(\boldsymbol{\xi}^t) y_{tj} \right] + C_t^o(\boldsymbol{\xi}^t) o_t.
\end{aligned}$$

For fixed  $\hat{\alpha}$ ,  $\boldsymbol{\xi}^t$  and  $t > 1$ , define  $\mathcal{L}_t(\hat{\alpha}, \boldsymbol{\xi}^t)$  as follows

$$\begin{aligned}
\mathcal{L}_t(\hat{\alpha}, \boldsymbol{\xi}^t) := & \min L_t(\hat{\alpha}, \boldsymbol{\xi}^t) \\
\text{s.t.} \quad & \sum_{j \in [J]} (TS_j y_{tj} + TB_j x_{tj}) - o_t \leq C_t \\
& M_{tj} y_{tj} - x_{tj} \geq 0, & j \in [J] \\
& i_{tj}^+ \leq I_{tj}, & j \in [J] \\
& i_{tj}^+ + x_{tj} \leq I_{t+1,j}, & j \in [J] \\
& 0 \leq o_t \leq O_t \\
& x_{tj}, i_{tj}^+, i_{tj}^- \geq 0, & j \in [J] \\
& y_{tj} \in \{0, 1\}, & j \in [J].
\end{aligned}$$

For  $t = 1$  we have

$$\begin{aligned}
\mathcal{L}_1(\hat{\alpha}, \boldsymbol{\xi}^1) := & \min L_1(\hat{\alpha}, \boldsymbol{\xi}^1) \\
\text{s.t.} \quad & i_{1j}^- - i_{1j}^+ = d_{1j}, & j \in [J] \\
& \sum_{j \in [J]} (TS_j y_{1j} + TB_j x_{1j}) - o_1 \leq C_1 \\
& M_{1j} y_{1j} - x_{1j} \geq 0, & j \in [J] \\
& i_{1j}^+ \leq I_{1j}, & j \in [J] \\
& i_{1j}^+ + x_{1j} \leq I_{2,j}, & j \in [J] \\
& 0 \leq o_1 \leq O_1
\end{aligned}$$

$$\begin{aligned} x_{1j}, i_{1j}^+, i_{1j}^- &\geq 0, & j \in [J] \\ y_{1j} &\in \{0, 1\}, & j \in [J]. \end{aligned}$$

Finally, the LDDR-restricted stagewise Lagrangian dual problem is defined as

$$\begin{aligned} \max \quad & \sum_{t \in [T]} \mathbb{E} [\mathcal{L}_t(\alpha, \boldsymbol{\xi}^t)] \\ \text{s.t.} \quad & \alpha_{tk} \in \mathbb{R}^J, \quad t \in [T], k \in [K_t]. \end{aligned}$$

## C.2. Nonanticipative Lagrangian Dual

Reformulate the MSLOT problem as follows

$$\begin{aligned} \min \quad & \mathbb{E} \left[ \sum_{t \in [T]} \left[ \sum_{j \in [J]} \left[ C_{tj}^{i^+}(\boldsymbol{\xi}^t) i_{tj}^{+,na}(\boldsymbol{\xi}^T) + C_{tj}^{i^-}(\boldsymbol{\xi}^t) i_{tj}^{-,na}(\boldsymbol{\xi}^T) + C_{tj}^y(\boldsymbol{\xi}^t) y_{tj}^{na}(\boldsymbol{\xi}^T) \right] + C_t^o(\boldsymbol{\xi}^t) o_t^{na}(\boldsymbol{\xi}^T) \right] \right] \\ \text{s.t.} \quad & i_{tj}^{-,na}(\boldsymbol{\xi}^T) - i_{tj}^{+,na}(\boldsymbol{\xi}^T) + i_{t-1,j}^{+,na}(\boldsymbol{\xi}^T) - i_{t-1,j}^{-,na}(\boldsymbol{\xi}^T) + x_{t-1,j}^{na}(\boldsymbol{\xi}^T) = D_{tj}(\boldsymbol{\xi}^t), & t \in [T], j \in [J], \mathbb{P}\text{-a.e. } \boldsymbol{\xi}^T \in \Xi \\ & \sum_{j \in [J]} (TS_j y_{tj}^{na}(\boldsymbol{\xi}^T) + TB_j x_{tj}^{na}(\boldsymbol{\xi}^T)) - o_t^{na}(\boldsymbol{\xi}^T) \leq C_t, & t \in [T], \mathbb{P}\text{-a.e. } \boldsymbol{\xi}^T \in \Xi \\ & M_{tj} y_{tj}^{na}(\boldsymbol{\xi}^T) - x_{tj}^{na}(\boldsymbol{\xi}^T) \geq 0, & t \in [T], j \in [J], \mathbb{P}\text{-a.e. } \boldsymbol{\xi}^T \in \Xi \\ & i_{tj}^{+,na}(\boldsymbol{\xi}^T) \leq I_{tj}, & t \in [T], j \in [J], \mathbb{P}\text{-a.e. } \boldsymbol{\xi}^T \in \Xi \\ & i_{tj}^{+,na}(\boldsymbol{\xi}^T) + x_{tj}^{+,na}(\boldsymbol{\xi}^T) \leq I_{t+1,j}, & t \in [T], j \in [J], \mathbb{P}\text{-a.e. } \boldsymbol{\xi}^T \in \Xi \\ & 0 \leq o_t^{na}(\boldsymbol{\xi}^T) \leq O_t, & t \in [T], \mathbb{P}\text{-a.e. } \boldsymbol{\xi}^T \in \Xi \\ & x_{tj}^{na}(\boldsymbol{\xi}^T) = \mathbb{E}_{\boldsymbol{\xi}^T} [x_{tj}^{na}(\boldsymbol{\xi}^T) | \boldsymbol{\xi}^t], & t \in [T], j \in [J], \mathbb{P}\text{-a.e. } \boldsymbol{\xi}^T \in \Xi \\ & x_{tj}^{na}(\boldsymbol{\xi}^T), i_{tj}^{+,na}(\boldsymbol{\xi}^T), i_{tj}^{-,na}(\boldsymbol{\xi}^T) \geq 0, & t \in [T], j \in [J], \mathbb{P}\text{-a.e. } \boldsymbol{\xi}^T \in \Xi \\ & y_{tj}^{na}(\boldsymbol{\xi}^T) \in \{0, 1\}, & t \in [T], j \in [J], \mathbb{P}\text{-a.e. } \boldsymbol{\xi}^T \in \Xi \end{aligned}$$

where for any variable  $a^{na}(\boldsymbol{\xi}^T)$  the superscript  $na$  indicates the anticipative copy variable corresponding to original variable  $a(\boldsymbol{\xi}^t)$ . Relaxing the nonanticipativity constraints using dual variables  $\gamma_t(\boldsymbol{\xi}^T)$  and enforcing LDDR on these duals as

$$\gamma_{tj}(\boldsymbol{\xi}^T) = \sum_{k' \in [K'_t]} \Psi_{tjk'}(\boldsymbol{\xi}^T) \alpha_{tjk'},$$

the LDDR-restricted nonanticipative Lagrangian dual problem is obtained as follows

$$\begin{aligned} \max \quad & \mathbb{E} [\mathcal{L}(\alpha, \boldsymbol{\xi}^T)] \\ \text{s.t.} \quad & \alpha_{tk'} \in \mathbb{R}^J, \quad t \in [T], k' \in [K'_t] \end{aligned}$$

where for fixed  $\hat{\alpha}$

$$\begin{aligned}
\mathcal{L}(\hat{\alpha}, \boldsymbol{\xi}^T) = \min & \sum_{t \in [T]} \left[ \sum_{j \in [J]} \left[ C_{tj}^{i^+}(\boldsymbol{\xi}^t) i_{tj}^{+,na} + C_{tj}^{i^-}(\boldsymbol{\xi}^t) i_{tj}^{-,na} + C_{tj}^y(\boldsymbol{\xi}^t) y_{tj}^{na} \right] + C_t^o(\boldsymbol{\xi}^t) o_t^{na} \right] \\
& + \sum_{t \in [T]} \sum_{j \in [J]} \sum_{k' \in [K'_t]} \left( \Psi_{tjk'}(\boldsymbol{\xi}^T) - \mathbb{E}_{\boldsymbol{\xi}^T}[\Psi_{tjk'}(\boldsymbol{\xi}^T) | \boldsymbol{\xi}^t] \right) \hat{\alpha}_{tjk'} x_{tj}^{na} \\
\text{s.t. } & i_{tj}^{-,na} - i_{tj}^{+,na} + i_{t-1,j}^{+,na} - i_{t-1,j}^{-,na} + x_{t-1,j}^{na} = D_{tj}(\boldsymbol{\xi}^t), & t \in [T], j \in [J] \\
& \sum_{j \in [J]} (TS_j y_{tj}^{na} + TB_j x_{tj}^{na}) - o_t^{na} \leq C_t, & t \in [T] \\
& M_{tj} y_{tj}^{na} - x_{tj}^{na} \geq 0, & t \in [T], j \in [J] \\
& i_{tj}^{+,na} \leq I_{tj}, & t \in [T], j \in [J] \\
& i_{tj}^{+,na} + x_{tj}^{+,na} \leq I_{t+1,j}, & t \in [T], j \in [J] \\
& 0 \leq o_t^{na} \leq O_t, & t \in [T] \\
& x_{tj}^{na}, i_{tj}^{+,na}, i_{tj}^{-,na} \geq 0, & t \in [T], j \in [J] \\
& y_{tj}^{na} \in \{0, 1\}, & t \in [T], j \in [J].
\end{aligned}$$

### C.3. Parameters of the MSLot Instances

Our instances are generated using parameters that are loosely based on the work of [Helber et al. \(2013\)](#). Section 5.3.1 explains the demand model. In this section, we specify the demand generation procedure and the rest of the parameters. Using consecutive substitutions, we can deduce that the following holds for the conditional expectation

$$\mathbb{E}[D_{t+h,j} | \epsilon_{tj}, \delta_{tj}] = \mu_{t+h,j} \left( \rho^Y \rho^h \left( \frac{D_{tj} - (1 - \rho^Y) \delta_{tj}}{\rho^Y \mu_{tj}} - 1 \right) + 1 \right).$$

We have generated instances with  $T = 2, \dots, 10$  stages, and  $J = 3, 6$  product types. There are two sets of data instances for  $J = 3$  with  $\rho = 0.2, \rho^Y = 0.6$  and  $\rho = 0.6, \rho^Y = 0.2$  leading to different levels of correlation and variation among demands. The combination  $\rho = 0.6, \rho^Y = 0.2$  is additionally used in the generation of instances with  $J = 6$ . For solving the SW and NA dual problems,  $\lceil \frac{50}{T} \rceil |\beta|_{\#}$  and  $\lceil \frac{100}{T} \rceil |\alpha|_{\#}$  scenarios are generated respectively, and the solutions are evaluated using  $\lceil \frac{250}{T} \rceil |\alpha|_{\#}$  scenarios, where  $|\cdot|_{\#}$  operator denotes the total number of variables of a given type (which depends on the choice of basis functions, discussed in Section 5.3.2). We do not consider a production cost. The overtime cost is 100 per unit of overtime. Holding cost is 15 per unit, while the backlog cost is  $(\delta_{i-})(c_{ij}^+)$ , where  $\delta_{i-} = 2$ . For the last stage though, we have an end of horizon effect and  $c_{Tj}^- = 150$ .  $TB_j$  is set to 1, and  $TS_j = ts^{rel} \overline{\mathbb{E}[D_j]} TB_j$ , where  $\overline{\mathbb{E}[D_j]} = \frac{\sum_{t \in [T]} \mathbb{E}[D_{tj}(\boldsymbol{\xi}^t)]}{T}$  is the average expected demand of product  $j$ , and  $ts^{rel}$  is 0.25. The setup cost is  $c_{ij}^y = \delta_y \overline{\mathbb{E}[D_j]} TBO^2 c_{ij}^+$ , where  $TBO$  is the processing time between orders (set to 2), and  $\delta_y$  is 1.2. Production capacity is

$C_t = 0.9 \frac{\sum_{j \in [J]} \mathbb{E}[D_{tj}(\xi^t)]}{Util}$ , where  $Util$  is 0.6. Inventory capacity is  $I_{tj} = \delta_I \overline{\mathbb{E}[D_j]}$ , with  $\delta_I = 10$ . The bound on overtime is  $O_t = \delta_O C_t$ , where  $\delta_O = 0.25$ . For big- $M$  values in the MSLOT formulation, we have  $M_j = 6 \overline{\mathbb{E}[D_j]}$ .

#### C.4. NA Variable Selection

In NA problem reformulation, another possibility to reduce the restricted dual problem size is to ignore altogether the NA constraints (4c) on some sets of variables. For example, in order to obtain a valid formulation it is sufficient to enforce (4c) only on *state variables*, i.e., variables that appear in more than one decision stage, and thus one may choose to only penalize the NA constraints associated with those variables. On the other hand, in the MSLOT problem, once the recourse variables  $x_t(\xi^t)$  are determined, the optimal values of the state variables  $i^-(\xi^t)$  and  $i^+(\xi^t)$  are immediate from the equations (27b), suggesting it may be beneficial to penalize violation of the NA constraints on these variables. (A similar approach is used by Lulli and Sen (2004).) A natural question for our LDDR approach is, can enforcing nonanticipativity additionally on the other variables (which is redundant before the relaxation) improve the bound?

In Table 5, we consider three options for instances with  $J = 3, \rho = 0.6, \rho^Y = 0.2$ : having either  $x$  or state variables  $i^+, i^-$  as the NA variables, or considering a combination of them. Results of Table 5 show that the combination of  $x, i^+, i^-$  obtains the best bounds in a longer running time. The difference between the means of the options was tested using a  $t$ -test. We find that the bounds obtained by penalizing the NA constraints on only the  $x$  variables are not significantly worse than those obtained by penalizing the NA constraints on all variables. In addition, including a penalty of the NA constraints  $x$  variables leads to an improvement over just including a penalty of the NA constraints on the state variables  $i^+$  and  $i^-$ . Since penalizing only the NA constraints on the  $x$  variables yields lower bounds that are indistinguishable from the best, in less time, we use this option in the remaining experiments.

#### C.5. Detailed Results

In the next pages, the actual numbers used in Section 5 are provided, without any scaling and normalization. Also, the confidence intervals are given for the bounds, in the form of (mean  $\pm$  width).

| Option | # Basis functions |       |       | Time (s) |        |        | Bound               |                      |                      |
|--------|-------------------|-------|-------|----------|--------|--------|---------------------|----------------------|----------------------|
|        | $T=4$             | $T=6$ | $T=8$ | $T=4$    | $T=6$  | $T=8$  | $T=4$               | $T=6$                | $T=8$                |
| 1      | 315               | 750   | 1365  | 353.8    | 1412.5 | 6273.9 | $32474.6 \pm 448.6$ | $41291.3 \pm 1194.2$ | $69849.2 \pm 5151.9$ |
| 2      | 180               | 300   | 420   | 91.7     | 243.7  | 632.5  | $30947.9 \pm 363.9$ | $39835.2 \pm 496.4$  | $66388.5 \pm 5159.7$ |
| 3      | 135               | 300   | 525   | 109      | 288.7  | 795.9  | $31053.7 \pm 371.9$ | $40195.4 \pm 671.9$  | $66727.2 \pm 2203.9$ |
| 4      | 90                | 150   | 210   | 157.2    | 795.9  | 323.6  | $29245.5 \pm 396.9$ | $38958.3 \pm 1086.0$ | $56882.1 \pm 4201.2$ |

Table 1: Basis function selection analysis for the SW dual

| Option | # Basis functions |       |       | Time (s) |       |        | Bound                |                      |                       |
|--------|-------------------|-------|-------|----------|-------|--------|----------------------|----------------------|-----------------------|
|        | $T=4$             | $T=6$ | $T=8$ | $T=4$    | $T=6$ | $T=8$  | $T=4$                | $T=6$                | $T=8$                 |
| 1      | 756               | 1800  | 3276  | 76.9     | 403.2 | 1800.8 | $53352.5 \pm 1261.5$ | $71767.2 \pm 2515.2$ | $123173.0 \pm 5101.1$ |
| 2      | 432               | 720   | 1008  | 44.9     | 232.3 | 770.5  | $49940.7 \pm 403.5$  | $67696.9 \pm 501.2$  | $114913.0 \pm 1834.5$ |
| 3      | 324               | 720   | 1260  | 61.1     | 250   | 776.8  | $53328.5 \pm 1186.6$ | $71352.1 \pm 1539.8$ | $122755.0 \pm 3085.8$ |
| 4      | 216               | 360   | 504   | 34.2     | 219.5 | 735.3  | $49902.7 \pm 407.0$  | $67247.6 \pm 442.2$  | $114829.0 \pm 1715.5$ |

Table 2: Basis function selection analysis for the NA dual

| Option        | Time (s) |       |        | Bound                |                      |                       |
|---------------|----------|-------|--------|----------------------|----------------------|-----------------------|
|               | $T=4$    | $T=6$ | $T=8$  | $T=4$                | $T=6$                | $T=8$                 |
| $x$           | 61.1     | 68.1  | 175.4  | $53328.5 \pm 1186.6$ | $71352.1 \pm 1539.8$ | $122755.0 \pm 3085.8$ |
| $i^+, i^-$    | 250.0    | 188.0 | 849.9  | $49456.0 \pm 403.9$  | $65348.7 \pm 392.2$  | $111605.0 \pm 1778.4$ |
| $x, i^+, i^-$ | 776.8    | 653.1 | 1887.3 | $53459.1 \pm 1012.2$ | $71844.8 \pm 939.4$  | $123403.0 \pm 2400.2$ |

Table 3: NA variable selection analysis

| $\lambda$ | Bound                 |                       |                       |
|-----------|-----------------------|-----------------------|-----------------------|
|           | $T=4$                 | $T=6$                 | $T=8$                 |
| 0.00      | $58292.3 \pm 481.1$   | $81073.9 \pm 672.5$   | $143503.0 \pm 1912.6$ |
| 0.25      | $56624.5 \pm 503.2$   | $80815.3 \pm 689.7$   | $143503.2 \pm 1928.4$ |
| 0.50      | $56925.1 \pm 499.4$   | $81138.1 \pm 680.5$   | $144290.8 \pm 1891.7$ |
| 1.00      | $118093.6 \pm 1357.2$ | $175553.3 \pm 1921.6$ | $282653.2 \pm 2651.1$ |

Table 4: Analysis of different values for  $\lambda$  in SW UB for the lot-sizing problem

| Instance                          | $T$                               | LB       |          |          | UB       |          |          |
|-----------------------------------|-----------------------------------|----------|----------|----------|----------|----------|----------|
|                                   |                                   | PI       | SW       | NA       | Cond Exp | SW       | NA       |
| $\rho = 0.2, \rho^y = 0.6, J = 3$ | 2                                 | 46584.6  | 33327.5  | 47189.4  | 49406.4  | 49406.4  | 49001.1  |
|                                   | 3                                 | 45487.7  | 29308.6  | 46735.3  | 51076.7  | 50660.4  | 50953.9  |
|                                   | 4                                 | 48868.7  | 29962.1  | 50537.6  | 56731.2  | 54878.6  | 53614.3  |
|                                   | 5                                 | 55920.5  | 31638.4  | 56965.3  | 64759.2  | 64062.4  | 61419.5  |
|                                   | 6                                 | 64844.7  | 38036.7  | 67777.5  | 75596.2  | 75515.2  | 75384.4  |
|                                   | 7                                 | 72980.9  | 42580.4  | 75263.3  | 84230.4  | 83838.4  | >6h      |
|                                   | 8                                 | 104296.0 | 67443.0  | 112093.0 | 129166.0 | 127026.0 | >6h      |
|                                   | 9                                 | 102604.0 | 60101.1  | 104760.0 | 121131.0 | 117865.0 | >6h      |
|                                   | 10                                | 114903.0 | 70844.6  | 122374.0 | 135756.0 | 134728.0 | >6h      |
|                                   | $\rho = 0.6, \rho^y = 0.2, J = 3$ | 2        | 46587.0  | 35050.1  | 46876.1  | 48484.6  | 48484.6  |
| 3                                 |                                   | 45547.9  | 29282.9  | 46585.9  | 50607.9  | 50109.8  | 49404.2  |
| 4                                 |                                   | 49070.8  | 32474.3  | 53328.5  | 58292.3  | 56624.5  | 54892.8  |
| 5                                 |                                   | 55927.6  | 35362.3  | 59325.2  | 67492.5  | 66928.6  | 63767.0  |
| 6                                 |                                   | 65167.3  | 41291.3  | 71352.1  | 81073.9  | 80815.3  | 82093.8  |
| 7                                 |                                   | 73532.0  | 46230.9  | 80838.4  | 91635.6  | 90969.8  | >6h      |
| 8                                 |                                   | 110344.0 | 69849.2  | 122755.0 | 145747.0 | 143503.0 | >6h      |
| 9                                 |                                   | 105611.0 | 63981.7  | 115548.0 | 135670.0 | 130932.0 | >6h      |
| 10                                |                                   | 120331.0 | 67950.0  | 134594.0 | 155783.0 | 154407.0 | >6h      |
| $\rho = 0.6, \rho^y = 0.2, J = 6$ |                                   | 2        | 97422.8  | 72505.3  | 98890.1  | 103233.0 | 103233.0 |
|                                   | 3                                 | 90470.1  | 56340.1  | 92717.4  | 104545.0 | 104218.0 | 103844.1 |
|                                   | 4                                 | 94000.1  | 53199.8  | 100338   | 113226.0 | 111675.8 | 111718.4 |
|                                   | 5                                 | 107992.0 | 62849.1  | 114973.0 | 134017.0 | 132604.4 | 132614.5 |
|                                   | 6                                 | 121141.0 | 67740.8  | 131226.0 | 153875.0 | 153151.2 | >6h      |
|                                   | 7                                 | 118421.0 | 65444.7  | 130542.0 | 175972.0 | 174715.2 | >6h      |
|                                   | 8                                 | 139644.0 | 106919.0 | 157804.0 | 240137.0 | 238465.8 | >6h      |
|                                   | 9                                 | 127301.0 | 107217.7 | 142417.0 | 235657.0 | 233470.2 | >6h      |
|                                   | 10                                | 135019.0 | 118333.6 | 156096.0 | 273716.0 | 270377.2 | >6h      |

Table 5: Bound comparison for various instances

| Instance                          | $T$                               | SW Time (s) |                       | NA Time (s) |                       |
|-----------------------------------|-----------------------------------|-------------|-----------------------|-------------|-----------------------|
|                                   |                                   | LB          | UB (avg./sample path) | LB          | UB (avg./sample path) |
| $\rho = 0.2, \rho^Y = 0.6, J = 3$ | 2                                 | 3.4         | <0.1s                 | 3.9         | <0.1s                 |
|                                   | 3                                 | 18.3        | <0.1s                 | 24.4        | 0.2                   |
|                                   | 4                                 | 161.4       | <0.1s                 | 59.7        | 0.8                   |
|                                   | 5                                 | 338.3       | <0.1s                 | 115.9       | 1.7                   |
|                                   | 6                                 | 750.7       | 0.1                   | 339.0       | 3.7                   |
|                                   | 7                                 | 960.0       | 0.2                   | 437.4       | 7.7                   |
|                                   | 8                                 | 2184.1      | 0.3                   | 605.3       | 9.5                   |
|                                   | 9                                 | 2460.0      | 0.4                   | 714.0       | 12.4                  |
|                                   | 10                                | 2711.4      | 0.5                   | 1975.4      | 17.6                  |
|                                   | $\rho = 0.6, \rho^Y = 0.2, J = 3$ | 2           | 3.5                   | <0.1s       | 3.9                   |
| 3                                 |                                   | 17.6        | <0.1s                 | 25.2        | 0.2                   |
| 4                                 |                                   | 67.6        | <0.1s                 | 58.2        | 0.7                   |
| 5                                 |                                   | 115.1       | <0.1s                 | 72.5        | 1.8                   |
| 6                                 |                                   | 675.2       | 0.1                   | 374.6       | 4.0                   |
| 7                                 |                                   | 883.8       | 0.1                   | 413.5       | 7.4                   |
| 8                                 |                                   | 1499.0      | 0.3                   | 645.0       | 9.6                   |
| 9                                 |                                   | 1725.6      | 0.5                   | 696.5       | 12.2                  |
| 10                                |                                   | 1919.7      | 0.4                   | 1741.7      | 16.5                  |
| $\rho = 0.6, \rho^Y = 0.2, J = 6$ |                                   | 2           | 20.2                  | <0.1s       | 19.0                  |
|                                   | 3                                 | 288.6       | <0.1s                 | 119.8       | 0.6                   |
|                                   | 4                                 | 512.7       | <0.1s                 | 679.9       | 2.0                   |
|                                   | 5                                 | 4747.9      | <0.1s                 | 1334.4      | 5.0                   |
|                                   | 6                                 | 6154.1      | 0.1                   | 2290.8      | 8.2                   |
|                                   | 7                                 | 10963.4     | 0.2                   | 3749.9      | 14.2                  |
|                                   | 8                                 | 12859.1     | 0.3                   | 7805.3      | 25.6                  |
|                                   | 9                                 | 13946.1     | 0.5                   | 8912.0      | 29.9                  |
|                                   | 10                                | 15524.3     | 0.5                   | 11228.1     | 42.0                  |

Table 6: Solution time of bounding techniques in seconds for the MSLot problem. For UB techniques, the average time of one sample path is given. For NA upper bounds with  $T > 6$ , the reported value is the average time over an evaluation sample of size 10.

## Appendix D: Solution Times for MSRWA Instances

| $( \Omega , \bar{R}, \gamma_0, \delta_1)$ | $T$ | Basis Function Option 1 Time (s) |    |    |                       | Basis Function Option 2 Time (s) |    |    |                       |
|-------------------------------------------|-----|----------------------------------|----|----|-----------------------|----------------------------------|----|----|-----------------------|
|                                           |     | NA                               | UB | SW | LB (avg./sample path) | NA                               | UB | SW | LB (avg./sample path) |
| (1, 10, 3, 0.2)                           | 3   | 122.2                            |    |    | 0.2                   | 76.0                             |    |    | 0.2                   |
|                                           | 4   | 417.0                            |    |    | 0.4                   | 200.2                            |    |    | 0.4                   |
|                                           | 5   | 1852.0                           |    |    | 0.8                   | 1193.2                           |    |    | 0.9                   |
| (1, 10, 4.5, 0.05)                        | 3   | 113.5                            |    |    | 0.2                   | 93.1                             |    |    | 0.2                   |
|                                           | 4   | 420.4                            |    |    | 0.4                   | 277.6                            |    |    | 0.5                   |
|                                           | 5   | 1325.7                           |    |    | 0.8                   | 951.0                            |    |    | 0.9                   |
| (3, 30, 9, 0.2)                           | 3   | 772.2                            |    |    | 0.2                   | 302.3                            |    |    | 0.3                   |
|                                           | 4   | 1533.4                           |    |    | 0.5                   | 787.0                            |    |    | 0.5                   |
|                                           | 5   | 5240.1                           |    |    | 0.9                   | 3339.9                           |    |    | 0.9                   |
| (3, 30, 13.5, 0.05)                       | 3   | 945.4                            |    |    | 0.2                   | 494.6                            |    |    | 0.2                   |
|                                           | 4   | 2800.8                           |    |    | 0.5                   | 1045.2                           |    |    | 0.5                   |
|                                           | 5   | 7117.1                           |    |    | 0.9                   | 3061.1                           |    |    | 0.9                   |

Table 7: Solution time of bounding techniques in seconds for the MSRWA problem.

## References

- Helber S, Sahling F, Schimmelpfeng K (2013) Dynamic capacitated lot sizing with random demand and dynamic safety stocks. *OR Spectrum* 35(1):75–105.
- Knapp AW (2005) *Basic Real Analysis* (Springer Science & Business Media).
- Lulli G, Sen S (2004) A branch-and-price algorithm for multistage stochastic integer programming with application to stochastic batch-sizing problems. *Management Science* 50(6):786–796.
